# Supplementary material for: In situphotoinitiated fabrication of phosphorylcholine-functionalized polyhedral oligomeric silsesquioxane hybrid monolithic column for mixed-mode capillary electrochromatography
Source: Royal Society of Chemistry journal article supplement (doi:10.1039/d2an00195k), 2022-01-01
Supplement: d2an00195k1.pdf [file d2an00195k1.pdf]

**In-situ photoinitiated fabrication of phosphorylcholine  
functionalized polyhedral oligomeric silsesquioxane hybrid  
monolithic column for mixed-mode capillary  
electrochromatography**

Xiaoyun Lei, Binyu Zhang, Yi Zhang, Ting Huang, Fengxiang Tang,

Xiaoping Wu\*

*Key laboratory for analytical science of food safety and biology; College of  
Chemistry, Fuzhou University, Fuzhou 350116, China*

\* Corresponding author: Xiaoping Wu

Postal address: College of Chemistry, Fuzhou University, Fuzhou 350116, China

Tel.: +86-591-22866131

Fax: +86-591-22866131

E-mail address: wapple@fzu.edu.cn (X. Wu)

**Fig. S1.** Pore size distribution curve of column B measured by mercury intrusion porosimetry.

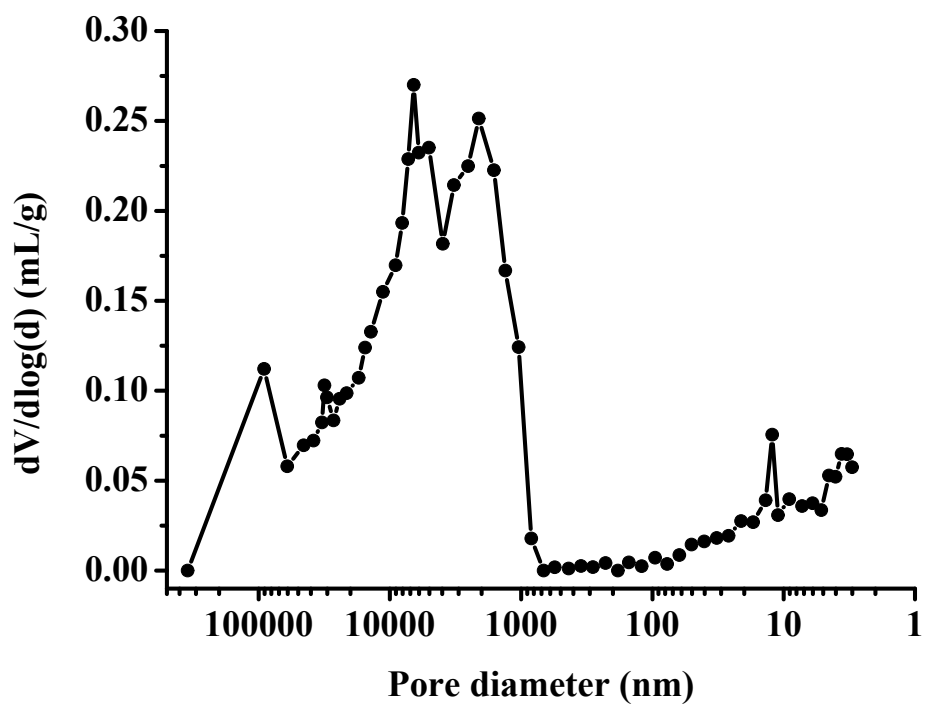

**Fig. S2.** The TGA curve of poly(POSS-co-MPC) hybrid monolithic column.

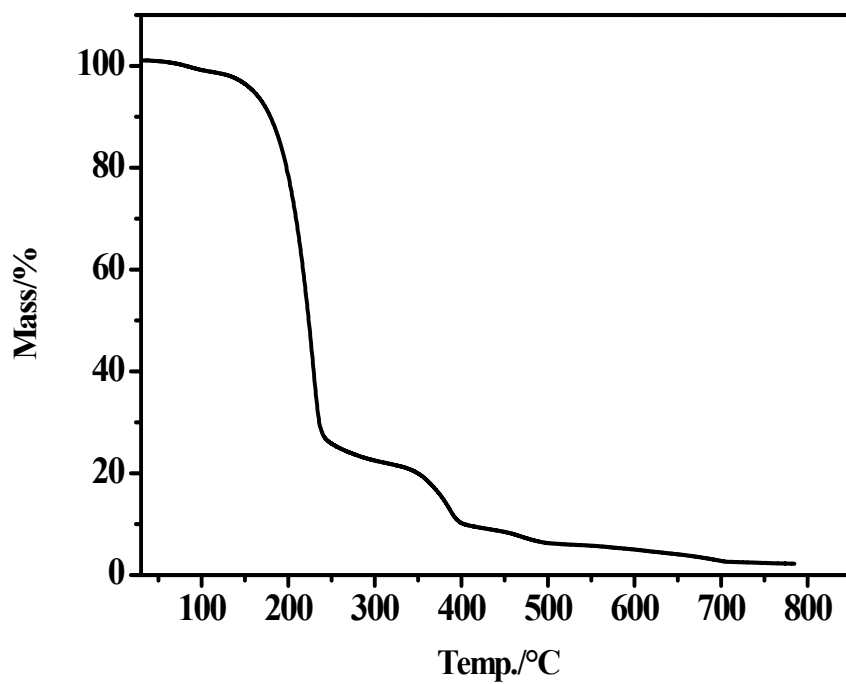

**Fig. S3.** Effects of the chromatographic conditions on the separation of nucleic acid bases. CEC conditions: mobile phase, (A) 10 mmol/L TEAP buffer (pH 3) with different content of ACN; (B) TEAP buffer (pH 3) containing 90% (v/v) ACN with buffer concentrations ranging from 5 to 20 mmol/L; (C) 10 mmol/L TEAP buffer containing 90% (v/v) ACN with different pH values; separation voltage, -18 kV; supplementary pressure, 250 psi; pump flow rate, 0.05 mL min<sup>-1</sup>; detection wavelength, 254 nm.

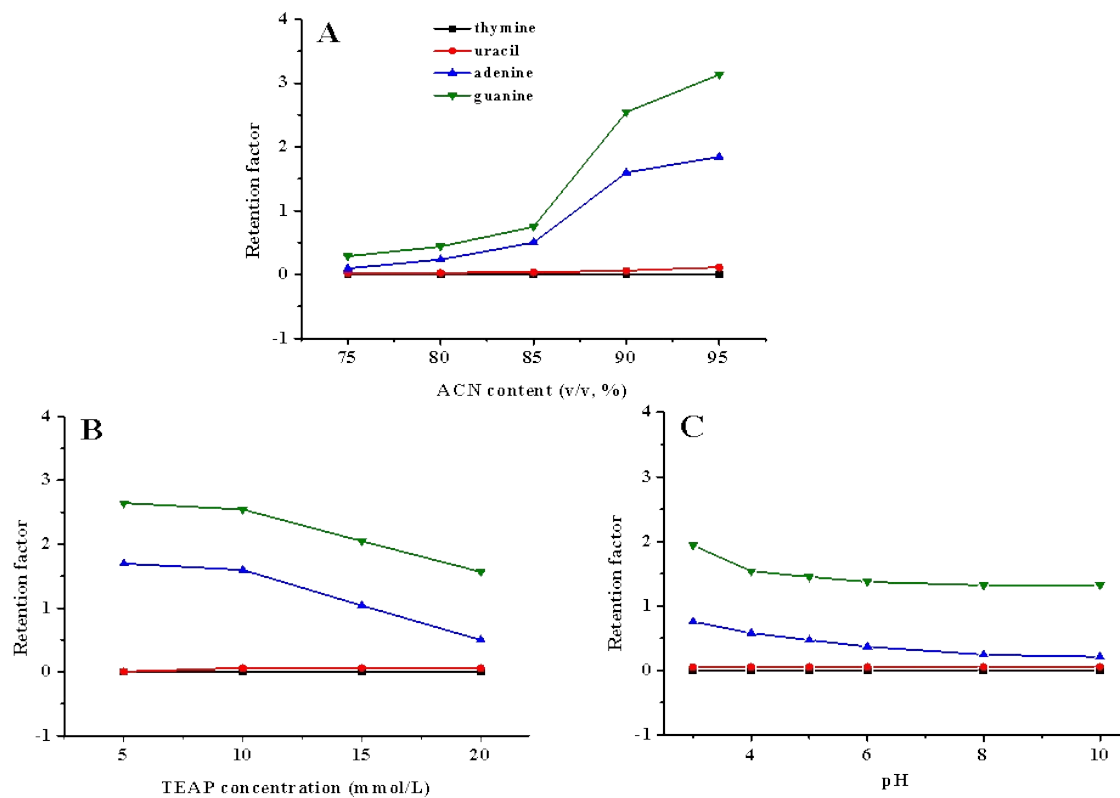

**Fig. S4.** Effects of the chromatographic conditions on the separation of nucleosides. CEC conditions: mobile phase, (A) 10 mmol/L TEAP buffer (pH 3) with different content of ACN; (B) TEAP buffer (pH 3) containing 90% (v/v) ACN with buffer concentrations ranging from 5 to 25 mmol/L; (C) 10 mmol/L TEAP buffer containing 90% (v/v) ACN with different pH values; separation voltage, -12 kV; supplementary pressure, 250 psi; pump flow rate, 0.05 mL min<sup>-1</sup>; detection wavelength, 254 nm.

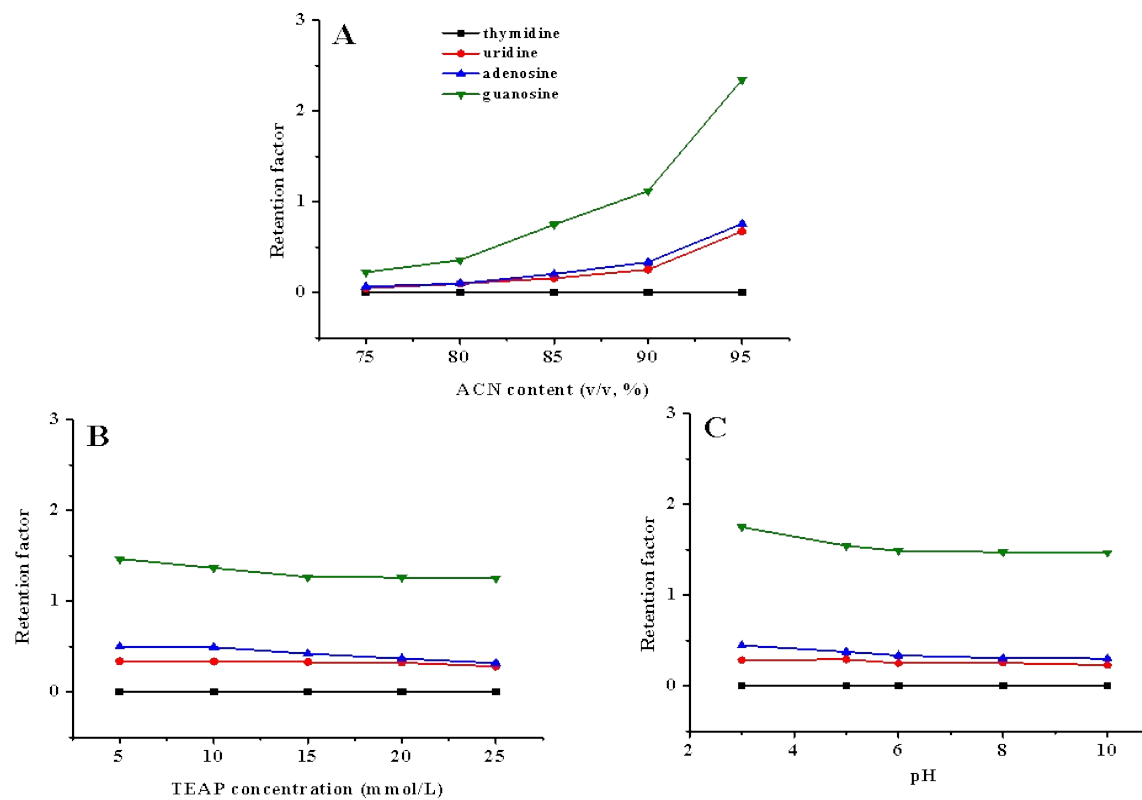

**Fig. S5.** Effects of the chromatographic conditions on the separation of benzoic acid derivatives. CEC conditions: mobile phase, (A) 10 mmol/L TEAP buffer (pH 3) with different content of ACN; (B) TEAP buffer (pH 3) containing 90% (v/v) ACN with buffer concentrations ranging from 5 to 25 mmol/L; (C) 10 mmol/L TEAP buffer containing 90% (v/v) ACN with different pH values; separation voltage, -12 kV; supplementary pressure, 500 psi; pump flow rate, 0.05 mL min<sup>-1</sup>; detection wavelength, 214 nm.

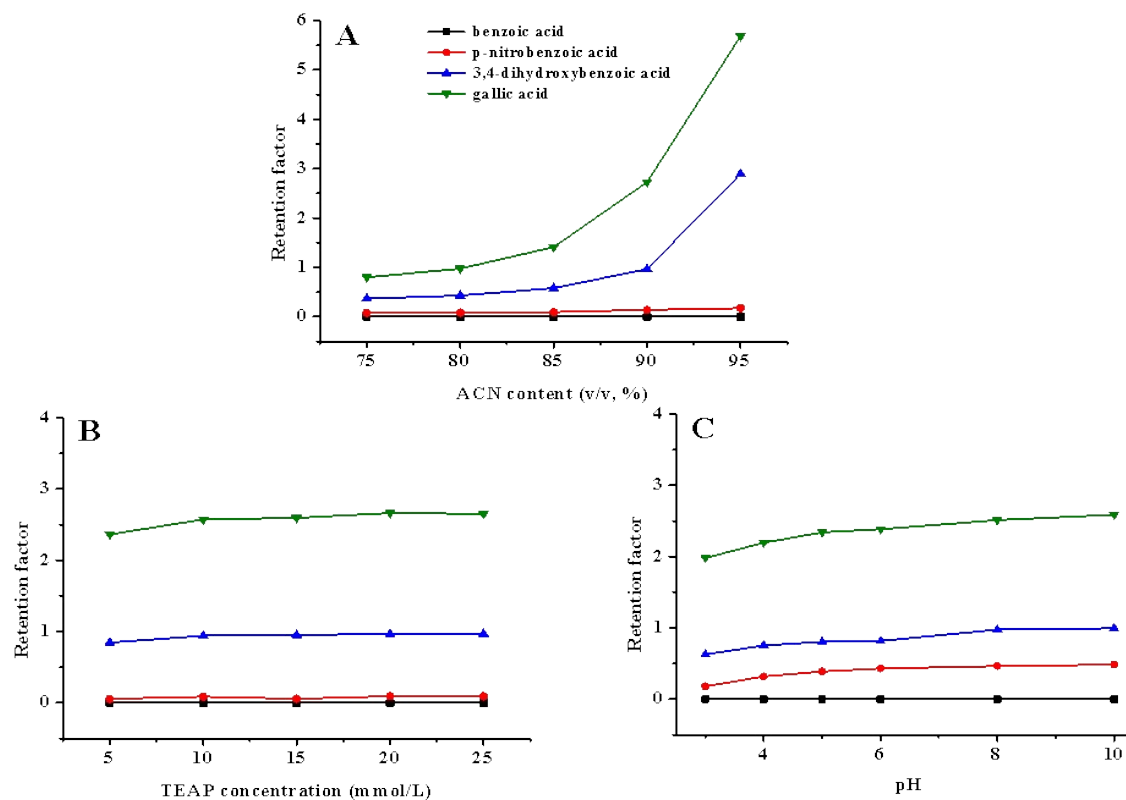

**Fig. S6.** Chromatogram on the poly(POSS-co-MPC) hybrid column for the separation of polypeptide antibiotics in spiked milk sample. CEC conditions: mobile phase, 50% ACN/10 mmol/L TEAP buffer (pH 3); separation voltage, -10 kV; supplementary pressure, 100 psi; pump flow rate, 0.05 mL min<sup>-1</sup>; detection wavelength, 214 nm; Order of peaks: 1, vancomycin; 2, teicoplanin; 3, bacitracin; 4, polymyxin B

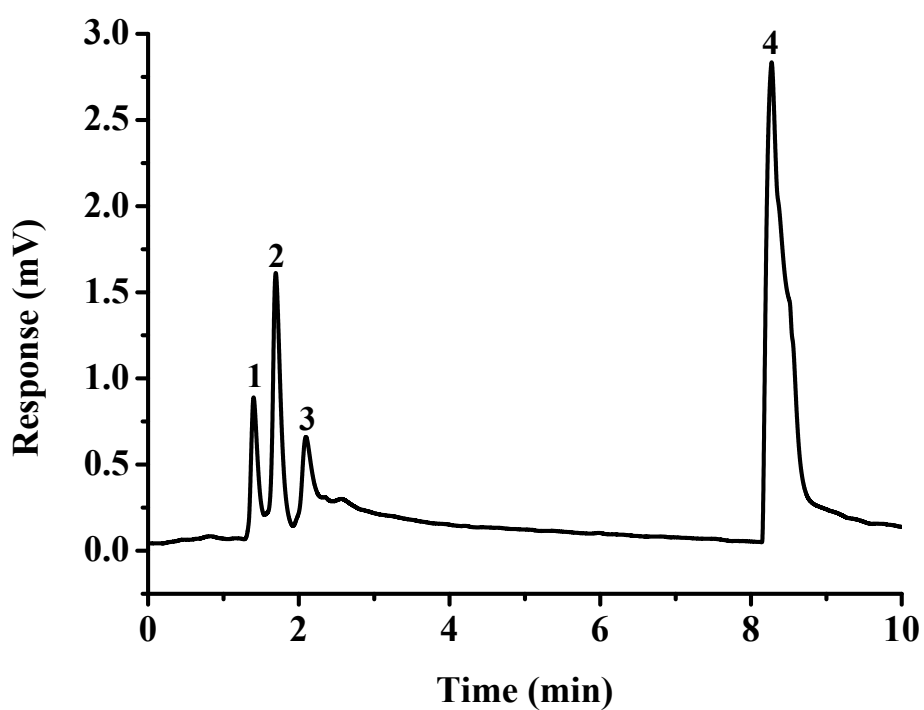

**Table S1** Performance comparison of different POSS-based monolithic columns.

| Stationary phases           | Detection method | Monolith preparation                            | Retention mechanisms   | Analytes                                                                                  | Column efficiency             | Ref. |
|-----------------------------|------------------|-------------------------------------------------|------------------------|-------------------------------------------------------------------------------------------|-------------------------------|------|
| POSS-VDI                    | HPLC-UV          | Thermal initiation<br>60 °C/ 12 h               | AEX <sup>a</sup> /RPLC | Alkylbenzenes, thioureas, Fangji, Root of Kudzu Vine, egg white                           | 109,000 N/m for alkylbenzenes | 48   |
| poly(POSS-co-META-co-DMMSA) | CEC-UV           | Thermal initiation<br>85 °C/ 10 min             | HILIC/IEX <sup>b</sup> | Nucleosides, bases, benzoic acids, glycopeptides                                          | 118,000 plates/m for thiourea | 38   |
| poly(POSS-co-TAPA)          | cLC-UV/LC-MS     | Photo initiation<br>30 min                      | RPLC                   | Phenolic, anilines, antibiotics mixtures, tryptic digest of HeLa cells                    | 40,773 N/m for benzene        | 49   |
| POSS-AVI-AG                 | HPLC-UV          | Thermal initiation<br>60 °C/ 12 h               | RPLC/HILIC             | Phenols, alkylbenzenes, aromatic amines, thioureas, nucleosides/nucleic, bases and amides | 571,000 plates/m for amides   | 29   |
| poly(DMABS-co-POSS)         | HPLC-UV          | Thermal initiation<br>60 °C/ 12 h<br>70 °C/ 6 h | HILIC                  | nucleosides, bases, phenols, aromatic acids, amides                                       | 208,000 plates/m for thiourea | 37   |



|                   |        |                           |           |                                                                    |                                 |              |
|-------------------|--------|---------------------------|-----------|--------------------------------------------------------------------|---------------------------------|--------------|
| poly(POSS-co-MPC) | CEC-UV | Photo initiation<br>8 min | HILIC/WCX | amides, nucleobases,<br>nucleosides, benzoic acids,<br>antibiotics | 93,500 plates/m for<br>thiourea | This<br>work |
|-------------------|--------|---------------------------|-----------|--------------------------------------------------------------------|---------------------------------|--------------|

---

a: Anion exchange.

b: Ion-exchange.
